# Supplementary material for: Multiple Origins of kdr-type Resistance in the House Fly, Musca domestica
Source: PubMed Central journal article supplement (PMC3532202; doi:10.1371/journal.pone.0052761), 2012-12-28
Supplement: pone.0052761.s001.pdf [file pone.0052761.s001.pdf]

**Supplemental Table 1.** Locations from which house flies were collected.

| Country  | Location                  | Coordinates | Collection Date | Reference  |
|----------|---------------------------|-------------|-----------------|------------|
| USA      | California, Riverside Co. | 33.78/116.8 | July 2008       | This paper |
|          | Florida, Gilchrist Co.    | 29.7/82.8   | June 2009       | This paper |
|          | Kansas, Riley Co.         | 39.3/96.7   | October 2009    | This paper |
|          | Minnesota, Ramsey Co.     | 45.0/93.1   | July 2008       | This paper |
|          | Montana, Gallatin Co.     | 45.7/111.1  | August 2008     | This paper |
|          | Nebraska, Lancaster Co.   | 40.8/96.7   | August 2008     | This paper |
|          | New Mexico, Dona Ana Co.  | 32.3/106.8  | July 2008       | This paper |
|          | New York, Chemung Co.     | 42.1/76.8   | August 2009     | This paper |
|          | North Carolina, Wade Co.  | 35.9/78.8   | July 2009       | This paper |
| Turkey   | Adana                     | 37.0/35.3   | Summer 2006     | [15]       |
|          | Afyon                     | 38.8/30.5   | “               | [15]       |
|          | Aydin                     | 37.8/28.5   | “               | [15]       |
|          | Burdur                    | 37.7/30.3   | “               | [15]       |
|          | Denizli                   | 37.8/29.1   | “               | [15]       |
|          | Hatay                     | 36.4/36.3   | “               | [15]       |
|          | Isparta                   | 37.7/30.5   | “               | [15]       |
|          | Izmir                     | 38.4/27.1   | “               | [15]       |
|          | Kahramanmaras             | 37.6/36.9   | “               | [15]       |
|          | Kutahya                   | 39.4/30.0   | “               | [15]       |
|          | Manisa                    | 38.6/27.4   | “               | [15]       |
|          | Mersin                    | 36.8/34.6   | “               | [15]       |
|          | Mugla                     | 37.2/28.4   | “               | [15]       |
| Osmaniye | 37.1/36.2                 | “           | [15]            |            |
| Usak     | 38.7/29.4                 | “           | [15]            |            |
| China    | Guangdong, Guangzhou      | 23.1/113.2  | Sept/Oct 2009   | [14]       |
|          | Shanghai, Feng Xian       | 30.9/121.4  | “               | [14]       |
|          | Shandong, Jinan           | 36.6/117.9  | “               | [14]       |
|          | Beijing, Chaoyang         | 40.0/116.4  | “               | [14]       |
|          | Jilin, Changchun          | 43.9/125.3  | “               | [14]       |

Coordinates are given as N/W for locations in the USA and are N/E for locations in Turkey and China.
