# Supplementary material for: Multiple Origins of kdr-type Resistance in the House Fly, Musca domestica
Source: PubMed Central journal article supplement (PMC3532202; doi:10.1371/journal.pone.0052761), 2012-12-28
Supplement: pone.0052761.s002.pdf [file pone.0052761.s002.pdf]

Supplemental Table 2. Intron haplotypes, GenBank Accession numbers and locations where each haplotype was observed.

| Haplotype         | Accession # | USA                                | Turkey                                                                     | China              |
|-------------------|-------------|------------------------------------|----------------------------------------------------------------------------|--------------------|
| <i>kdr1</i>       | AY850260.2  | FL, MN, NC, NE, NY                 |                                                                            | Guangdong          |
| <i>kdr2</i>       | AY850261.2  | FL, KS, MN, MT, NE, NY             | Adana, Hatay, Isparta, Kahramanmaras, Mersin                               | Guangdong          |
| <i>kdr3</i>       | HD047549    | CA, KS, MN, NE                     |                                                                            |                    |
| <i>kdr4</i>       | HD047548    | FL, MT                             |                                                                            |                    |
| <i>kdr5</i>       | JX139755    | NE                                 |                                                                            |                    |
| <i>kdr-his1</i>   | AY850262.1  | CA, FL, KS, MN, MT, NC, NE, NM, NY |                                                                            | Guangdong          |
| <i>kdr-his2</i>   | AY850263.2  | FL                                 |                                                                            |                    |
| <i>kdr-his3</i>   | HD04750     | CA, FL, KS, MN, MT, NE, NM         |                                                                            |                    |
| <i>kdr-his4</i>   | JX139755    | CA                                 | Afyon, Aydin, Burdur, Denizli, Hatay, Izmir, Kutahya, Manisa, Mersin, Uzak |                    |
| <i>kdr-his5</i>   | JX139756    |                                    | Mersin                                                                     |                    |
| <i>kdr-his6</i>   | JX139757    |                                    |                                                                            | Shandong           |
| <i>kdr-his7</i>   | JX139758    |                                    |                                                                            | Shandong           |
| <i>kdr-his8</i>   | JX139759    |                                    |                                                                            | Shandong           |
| <i>kdr-his9</i>   | JX139760    |                                    | Adana, Burdur, Hatay, Isparta, Izmir, Kahramanmaras                        | Shandong, Shanghai |
| <i>super-kdr1</i> | AY850261.2  | NY                                 |                                                                            |                    |
| <i>super-kdr2</i> | HD047549    | KS, MN, MT, NE                     |                                                                            |                    |
| <i>super-kdr3</i> | AY850260    | KS, MN                             |                                                                            |                    |
| v1                | JX174536    |                                    |                                                                            |                    |
| v2                | JX174537    | FL                                 |                                                                            |                    |
| v3                | AY850270.2  |                                    |                                                                            |                    |
| v4                | AY850271.2  |                                    |                                                                            |                    |
| v5                | AY850268.3  | NE                                 | Burdur                                                                     |                    |
| v6                | AY851288.2  | CA, MN, NE                         | Aydin, Isparta, Kahramanmaras                                              |                    |
| v7                | AY850264.2  | CA, MN, MT, NM                     | Adana,                                                                     |                    |
| v8                | AY850265.2  | CA, FL, MN, MT, NE                 | Manisa                                                                     |                    |
| v9                | AY850266.2  |                                    | Mersin                                                                     |                    |
| v10               | AY850267.2  |                                    |                                                                            |                    |
| v11               | AY850269.2  |                                    | Mugla                                                                      |                    |
| v12               | AY850272.2  |                                    |                                                                            |                    |
| v13               | AY850273.2  |                                    |                                                                            |                    |
| v14               | HD047523    | NY                                 |                                                                            |                    |
| v15               | HD047524    | NY                                 |                                                                            |                    |
| v16               | HD047525    | MN, MT, NE, NY                     | Izmir, Osmaniye                                                            | Beijing, Shanghai  |
| v17               | HD047526    | KS                                 |                                                                            |                    |

|     |          |                               |                                                         |           |
|-----|----------|-------------------------------|---------------------------------------------------------|-----------|
| v18 | HD047527 | FL                            |                                                         |           |
| v19 | HM047528 |                               | Mugla                                                   |           |
| v20 | HD047528 | FL                            |                                                         |           |
| v21 | HD047529 | FL                            |                                                         |           |
| v22 | HD047530 | FL                            |                                                         |           |
| v23 | HD047531 | FL                            | Mersin, Mugla                                           |           |
| v24 | HD047532 | FL                            |                                                         |           |
| v25 | HD047533 | FL                            |                                                         |           |
| v26 | HD047534 | CA, FL, KS, MT,<br>NE, NM     | Osmaniye                                                |           |
| v27 | HD047535 | FL                            |                                                         |           |
| v28 | HD047536 | FL                            | Adana, Hatay,<br>Isparta,<br>Kahramanmaras,<br>Osmaniye |           |
| v29 | HD047537 | FL                            |                                                         |           |
| v30 | HD047538 | FL, NE, NM                    | Aydin                                                   |           |
| v31 | HD047539 | CA, FL, NE, NM                | Izmir                                                   |           |
| v32 | HD047540 | FL                            |                                                         |           |
| v33 | HD047541 | CA, KS, MN, MT,<br>NE, NM     |                                                         | Guangdong |
| v34 | HD047542 | KS, MN                        |                                                         |           |
| v35 | HD047543 | KS                            |                                                         |           |
| v36 | HD047544 | KS, NE                        |                                                         |           |
| v37 | HD047545 | KS                            | Mugla                                                   |           |
| v38 | HM047547 |                               | Aydin, Isparta                                          | Jilin     |
| v39 | AY850261 | CA, FL, KS, MN,<br>MT, NE, NM | Adana, Aydin,<br>Burdur, Hatay, Izmir                   | Guangdong |
| v40 | HD047546 | FL                            | Afyon, Osmaniye                                         |           |
| v41 | AY850263 | KS                            |                                                         |           |
| v42 | HD047547 | CA, KS, NE, NM                |                                                         |           |
| v43 | JX174538 | NE                            |                                                         |           |
| v44 | JX174539 |                               |                                                         |           |
| v45 | JX174540 |                               | Kahramanmaras                                           |           |
| v46 | JX174541 |                               | Adana                                                   |           |
| v47 | JX174542 |                               | Mugla,                                                  |           |
| v48 | JX174543 |                               |                                                         |           |
| v49 | JX174544 |                               | Hatay, Isparta,<br>Mersin                               |           |
| v50 | JX174545 |                               | Isparta                                                 |           |
| v51 | JX174546 |                               | Burdur                                                  |           |
| v52 | JX174547 |                               | Afyon                                                   |           |
| v53 | JX174548 |                               | Adana, Denizli                                          |           |
| v54 | JX174549 |                               |                                                         |           |
| v55 | JX174550 |                               |                                                         | Guangdong |
| v56 | JX174551 |                               |                                                         | Guangdong |
| v57 | JX174552 |                               |                                                         | Beijing   |
| v58 | JX174553 |                               |                                                         | Beijing   |
| v59 | JX174554 |                               |                                                         | Beijing   |
| v60 | JX174555 |                               |                                                         | Beijing   |
| v61 | JX174556 |                               |                                                         | Jilin     |
| v62 | JX174557 |                               |                                                         | Jilin     |
| v63 | JX174558 |                               |                                                         | Jilin     |
| v64 | JX174559 |                               |                                                         | Jilin     |

|      |          |                |                         |          |
|------|----------|----------------|-------------------------|----------|
| v65  | JX174560 |                |                         |          |
| v66  | JX174561 |                |                         | Shandong |
| v67  | JX174562 |                |                         | Shandong |
| v68  | JX174563 |                |                         | Shandong |
| v69  | JX174564 |                |                         | Shanghai |
| v70  | JX174565 |                |                         | Shanghai |
| v71  | JX174566 |                |                         | Shanghai |
| v72  | JX174567 |                |                         | Shanghai |
| v73  | JX174568 | KS             |                         |          |
| v74  | JX174569 | CA, MT         |                         |          |
| v75  | JX174570 | CA, MT         |                         |          |
| v76  | JX174571 | CA, MT, NM     |                         |          |
| v77  | JX174572 | MT             |                         |          |
| v78  | JX174573 | CA, NE, NM     |                         |          |
| v79  | JX174574 | NE             |                         |          |
| v80  | JX174575 | CA, MN, NE, NM |                         |          |
| v81  | JX174576 |                | Aydin, Izmir,<br>Manisa |          |
| v82  | JX174577 |                |                         |          |
| v83  | JX174578 |                |                         |          |
| v84  | JX174579 |                | Burdur                  |          |
| v85  | JX174580 |                | Manisa                  |          |
| v86  | JX174581 |                | Manisa, Mersin          |          |
| v87  | JX174582 |                | Manisa                  |          |
| v88  | JX174583 |                | Adana                   |          |
| v89  | JX174584 |                | Adana                   |          |
| v90  | JX174585 |                | Hatay, Uzak             |          |
| v91  | JX174586 |                | Hatay                   |          |
| v92  | JX174587 |                | Isparta                 |          |
| v93  | JX174588 |                | Mersin                  |          |
| v94  | JX174589 |                | Isparta                 |          |
| v95  | JX174590 |                | Denzili                 |          |
| v96  | JX174591 |                | Denzili                 |          |
| v97  | JX174592 |                | Denzili                 |          |
| v98  | JX174593 |                | Uzak                    |          |
| v99  | JX174594 |                | Uzak                    |          |
| v100 | JX174595 |                | Denzili                 |          |
| v101 | JX174596 |                | Denzili                 |          |
| v102 | JX174597 |                | Denzili                 |          |
| v103 | JX174598 |                | Denzili                 |          |
